# Supplementary material for: Therapeutic Efficacy of Orally Administered Nitrofurantoin against Animal African Trypanosomosis Caused by Trypanosoma congolense Infection
Source: MDPI journal article supplement (doi:10.3390/pathogens11030331), 2022-03-09
Supplement: s1 [file s1]

Supplement Table S1: Summary of blood parameters

| Analyzed mice number      | Group I         | Group II<br>(Non treated) | Group III<br>(10 mg/kg) | Group IV<br>(20 mg/kg) | Group V<br>(30 mg/kg) | Group VI<br>(50 mg/kg) | Group VII<br>(100 mg/kg) |
|---------------------------|-----------------|---------------------------|-------------------------|------------------------|-----------------------|------------------------|--------------------------|
| Pre                       | 12              | 8                         | 8                       | 8                      | 8                     | 8                      | 8                        |
| Day2                      | 12              | 8                         | 8                       | 8                      | 8                     | 8                      | 8                        |
| Day4                      | 12              | 8                         | 8                       | 8                      | 8                     | 8                      | 8                        |
| Day7                      | 12              | 6                         | 8                       | 8                      | 8                     | 8                      | 8                        |
| Day9                      | 12              | 2                         | 8                       | 8                      | 8                     | 8                      | 8                        |
| Day11                     | 12              | 2                         | 8                       | 8                      | 8                     | 8                      | 8                        |
| Day14                     | 12              |                           | 8                       | 8                      | 8                     | 8                      | 8                        |
| Day16                     | 12              |                           | 8                       | 8                      | 8                     | 8                      | 8                        |
| Day18                     | 12              |                           | 1                       | 8                      | 8                     | 8                      | 8                        |
| Day25                     | 12              |                           | 1                       | 7                      | 8                     | 8                      | 8                        |
| WBC (10 <sup>2</sup> /μL) | Group I         | Group II<br>(Non treated) | Group III<br>(10 mg/kg) | Group IV<br>(20 mg/kg) | Group V<br>(30 mg/kg) | Group VI<br>(50 mg/kg) | Group VII<br>(100 mg/kg) |
| Pre                       | 160.17 ± 42.00  | 155.00 ± 56.15            | 133.00 ± 22.53          | 187.13 ± 32.64         | 138.00 ± 18.36        | 122.75 ± 35.61         | 137.25 ± 57.10           |
| Day2                      | 156.50 ± 35.57  | 114.38 ± 44.14            | 80.63 ± 24.53***        | 108.25 ± 19.16*        | 96.38 ± 30.39**       | 118.63 ± 34.72         | 104.5 ± 16.64*           |
| Day4                      | 159.58 ± 34.14  | 133.63 ± 19.26            | 121.00 ± 22.74          | 146.63 ± 25.09         | 133.75 ± 20.48        | 137.88 ± 19.19         | 140.75 ± 43.46           |
| Day7                      | 146.83 ± 31.37  | 111.00 ± 20.14            | 134.63 ± 37.66          | 155.50 ± 38.41         | 111.75 ± 16.08        | 165.50 ± 24.11         | 184.13 ± 52.40           |
| Day9                      | 142.42 ± 34.61  | 288.50 ± 31.82****        | 206.38 ± 64.80**        | 100.13 ± 20.02         | 71.13 ± 10.62***      | 139.75 ± 20.39         | 186.13 ± 41.59           |
| Day11                     | 120.58 ± 32.80  | 169.50 ± 58.69            | 203.63 ± 131.5****      | 103.38 ± 37.43         | 78.75 ± 13.33         | 169.88 ± 31.93*        | 132.25 ± 23.80           |
| Day14                     | 169.42 ± 22.83  |                           | 125.25 ± 50.23*         | 126.63 ± 28.27*        | 127.63 ± 37.42*       | 149.00 ± 52.04         | 135.75 ± 55.92           |
| Day16                     | 122.42 ± 39.33  |                           | 107.63 ± 29.83          | 64.00 ± 8.05**         | 66.63 ± 16.28**       | 149.75 ± 16.52         | 128.25 ± 15.42           |
| Day18                     | 170.42 ± 39.65  |                           | 133                     | 139.50 ± 42.00         | 142.13 ± 20.10        | 165.50 ± 23.15         | 134.50 ± 22.47           |
| Day25                     | 144.00 ± 23.09  |                           | 148                     | 224.29 ± 74.37***      | 158.25 ± 40.35        | 162.00 ± 23.32         | 144.13 ± 22.77           |
| RBC (10 <sup>4</sup> /μL) | Group I         | Group II<br>(Non treated) | Group III<br>(10 mg/kg) | Group IV<br>(20 mg/kg) | Group V<br>(30 mg/kg) | Group VI<br>(50 mg/kg) | Group VII<br>(100 mg/kg) |
| Pre                       | 869.33 ± 68.45  | 884.88 ± 84.08            | 883.13 ± 61.80          | 917.63 ± 76.44         | 946.88 ± 32.99        | 915.75 ± 88.55         | 922.63 ± 50.71           |
| Day2                      | 870.92 ± 65.62  | 923.13 ± 51.58            | 797.13 ± 162.68         | 962.75 ± 34.12         | 986.88 ± 54.31*       | 868.25 ± 85.18         | 929.00 ± 107.45          |
| Day4                      | 812.26 ± 265.90 | 954.38 ± 153.17**         | 927.75 ± 78.91*         | 928.25 ± 90.12*        | 941.13 ± 40.36*       | 878.50 ± 68.21         | 915.63 ± 77.19           |
| Day7                      | 925.58 ± 34.28  | 853.33 ± 60.40            | 842 ± 78.55             | 872.50 ± 81.12         | 930.63 ± 34.00        | 861.88 ± 64.93         | 899.13 ± 112.14          |
| Day9                      | 927.00 ± 77.09  | 771.50 ± 34.65            | 747.88 ± 83.87***       | 945.63 ± 80.62         | 966.25 ± 48.00        | 850.88 ± 93.20         | 881.88 ± 119.53          |
| Day11                     | 882.50 ± 70.16  | 838.00 ± 121.62           | 837.63 ± 84.56          | 880.38 ± 85.38         | 977.38 ± 50.13        | 909.88 ± 46.96         | 911.63 ± 60.85           |
| Day14                     | 902.00 ± 93.92  |                           | 909.25 ± 122.38         | 851.38 ± 39.49         | 878.88 ± 72.76        | 944.00 ± 54.30         | 951.50 ± 41.65           |
| Day16                     | 857.33 ± 60.51  |                           | 819.88 ± 108.51         | 926.00 ± 69.92         | 896.63 ± 84.69        | 924.125 ± 62.11        | 883.13 ± 85.71           |
| Day18                     | 902.75 ± 42.81  |                           | 865                     | 902.38 ± 80.61         | 857.25 ± 59.16        | 939.13 ± 61.20         | 910.38 ± 35.24           |

| Day25      | 904.50 ± 64.17 |                           | 816                     | 874.14 ± 77.38         | 919.88 ± 97.21        | 936.75 ± 64.06         | 913.13 ± 74.17           |
|------------|----------------|---------------------------|-------------------------|------------------------|-----------------------|------------------------|--------------------------|
| HGB (g/dL) | Group I        | Group II                  | Group III<br>(10 mg/kg) | Group IV<br>(20 mg/kg) | Group V<br>(30 mg/kg) | Group VI<br>(50 mg/kg) | Group VII<br>(100 mg/kg) |
| Pre        | 12.87 ± 0.83   | 12.99 ± 1.33              | 12.96 ± 0.71            | 13.35 ± 1.10           | 13.71 ± 0.49          | 13.41 ± 1.31           | 13.50 ± 0.67             |
| Day2       | 12.90 ± 0.97   | 13.51 ± 0.68              | 11.81 ± 2.35            | 14.10 ± 0.73           | 14.53 ± 0.80*         | 12.96 ± 1.23           | 13.86 ± 1.55             |
| Day4       | 12.87 ± 1.31   | 13.94 ± 2.69              | 13.31 ± 1.17            | 13.51 ± 1.33           | 13.41 ± 0.63          | 12.71 ± 0.77           | 13.39 ± 1.21             |
| Day7       | 13.51 ± 0.63   | 12.35 ± 0.87              | 12.33 ± 0.99            | 12.46 ± 1.22           | 13.35 ± 0.46          | 12.51 ± 1.03           | 13.01 ± 1.61             |
| Day9       | 13.69 ± 1.21   | 11.15 ± 0.35*             | 10.64 ± 1.25****        | 13.80 ± 1.26           | 13.93 ± 0.64          | 12.04 ± 1.15*          | 12.86 ± 1.68             |
| Day11      | 12.87 ± 1.01   | 11.90 ± 1.84              | 11.89 ± 1.08            | 12.43 ± 1.18           | 13.96 ± 0.72          | 12.96 ± 0.68           | 13.19 ± 1.05             |
| Day14      | 13.23 ± 0.88   |                           | 12.73 ± 1.59            | 11.94 ± 0.52*          | 12.44 ± 1.10          | 13.31 ± 0.70           | 13.56 ± 0.56             |
| Day16      | 12.56 ± 0.87   |                           | 11.54 ± 1.35            | 13.06 ± 0.78           | 12.98 ± 1.23          | 13.01 ± 0.95           | 12.49 ± 1.31             |
| Day18      | 13.15 ± 0.69   |                           | 12.2                    | 12.65 ± 1.04           | 12.20 ± 1.01          | 13.19 ± 0.85           | 12.91 ± 0.51             |
| Day25      | 13.06 ± 0.91   |                           | 10.8                    | 12.10 ± 1.17           | 12.96 ± 1.46          | 13.03 ± 0.89           | 12.83 ± 1.00             |
| HCT (%)    | Group I        | Group II<br>(Non treated) | Group III<br>(10 mg/kg) | Group IV<br>(20 mg/kg) | Group V<br>(30 mg/kg) | Group VI<br>(50 mg/kg) | Group VII<br>(100 mg/kg) |
| Pre        | 40.23 ± 3.10   | 40.76 ± 4.14              | 41.04 ± 2.72            | 42.68 ± 3.51           | 43.94 ± 1.29          | 42.61 ± 4.22           | 42.81 ± 2.48             |
| Day2       | 40.08 ± 2.74   | 42.25 ± 2.72              | 37.09 ± 7.34            | 44.51 ± 2.23*          | 45.68 ± 2.59**        | 40.23 ± 4.07           | 43.10 ± 4.96             |
| Day4       | 40.26 ± 4.47   | 43.19 ± 6.71              | 42.44 ± 3.62            | 42.33 ± 4.13           | 42.61 ± 1.70          | 40.04 ± 3.12           | 41.96 ± 3.54             |
| Day7       | 42.73 ± 1.61   | 38.32 ± 2.54              | 38.63 ± 3.35            | 39.85 ± 3.73           | 42.26 ± 1.40          | 39.45 ± 3.11           | 41.15 ± 5.11             |
| Day9       | 42.79 ± 3.22   | 35.35 ± 0.92*             | 34.71 ± 4.51****        | 42.95 ± 3.60           | 44.04 ± 2.10          | 38.79 ± 4.05           | 40.51 ± 5.36             |
| Day11      | 40.36 ± 2.87   | 37.75 ± 6.34              | 39.63 ± 3.28            | 39.79 ± 3.47           | 43.99 ± 2.19          | 41.25 ± 2.22           | 41.56 ± 2.82             |
| Day14      | 41.45 ± 2.74   |                           | 42.03 ± 5.00            | 38.49 ± 1.60           | 39.74 ± 3.39          | 42.95 ± 2.35           | 43.55 ± 1.94             |
| Day16      | 39.37 ± 2.55   |                           | 37.04 ± 4.39            | 41.85 ± 2.66           | 41.04 ± 4.12          | 41.75 ± 2.87           | 40.30 ± 3.87             |
| Day18      | 41.43 ± 1.83   |                           | 42                      | 40.95 ± 3.57           | 39.04 ± 2.73          | 42.48 ± 2.86           | 41.41 ± 1.70             |
| Day25      | 41.45 ± 2.81   |                           | 38.3                    | 38.99 ± 3.64           | 41.58 ± 4.35          | 41.86 ± 2.73           | 41.20 ± 3.23             |
| MCV (fL)   | Group I        | Group II<br>(Non treated) | Group III<br>(10 mg/kg) | Group IV<br>(20 mg/kg) | Group V<br>(30 mg/kg) | Group VI<br>(50 mg/kg) | Group VII<br>(100 mg/kg) |
| Pre        | 46.27 ± 0.45   | 46.05 ± 0.52              | 46.49 ± 1.05            | 46.50 ± 0.83           | 46.41 ± 0.51          | 46.54 ± 0.47           | 46.38 ± 0.46             |
| Day2       | 46.05 ± 0.69   | 45.76 ± 0.53              | 46.58 ± 0.91            | 46.21 ± 0.81           | 46.28 ± 0.36          | 46.31 ± 0.60           | 46.41 ± 0.30             |
| Day4       | 46.28 ± 0.38   | 45.28 ± 0.51**            | 45.74 ± 1.13            | 45.59 ± 0.93           | 45.28 ± 0.36**        | 45.56 ± 0.49           | 45.83 ± 0.42             |
| Day7       | 46.17 ± 0.68   | 44.92 ± 0.60**            | 45.89 ± 1.04            | 45.68 ± 0.84           | 45.43 ± 0.47          | 45.78 ± 0.40           | 45.76 ± 0.29             |
| Day9       | 46.19 ± 0.89   | 45.85 ± 0.92              | 46.34 ± 1.16            | 45.45 ± 0.92           | 45.56 ± 0.47          | 45.63 ± 0.41           | 45.95 ± 0.42             |
| Day11      | 45.78 ± 0.70   | 44.95 ± 1.20              | 47.40 ± 1.07****        | 45.26 ± 0.93           | 45.01 ± 0.33          | 45.34 ± 0.55           | 45.60 ± 0.29             |
| Day14      | 45.98 ± 0.70   |                           | 46.39 ± 2.04            | 45.23 ± 0.89           | 45.20 ± 0.50          | 45.50 ± 0.53           | 45.78 ± 0.37             |
| Day16      | 45.95 ± 0.49   |                           | 45.28 ± 2.08            | 45.23 ± 1.04           | 45.74 ± 0.51          | 45.18 ± 0.47           | 45.64 ± 0.39             |
| Day18      | 45.89 ± 0.49   |                           | 48.6*                   | 45.38 ± 0.97           | 45.53 ± 0.38          | 45.23 ± 0.56           | 45.49 ± 0.28             |
| Day25      | 45.83 ± 0.52   |                           | 46.9                    | 44.59 ± 1.02*          | 45.20 ± 0.74          | 44.69 ± 0.54*          | 45.14 ± 0.45             |

| MCH (pg)                  | Group I       | Group II<br>(Non treated) | Group III<br>(10 mg/kg) | Group IV<br>(20 mg/kg) | Group V<br>(30 mg/kg) | Group VI<br>(50 mg/kg) | Group VII<br>(100 mg/kg) |
|---------------------------|---------------|---------------------------|-------------------------|------------------------|-----------------------|------------------------|--------------------------|
| Pre                       | 14.82 ± 0.32  | 14.66 ± 0.33              | 14.70 ± 0.43            | 14.56 ± 0.27           | 14.51 ± 0.27          | 14.65 ± 0.30           | 14.65 ± 0.23             |
| Day2                      | 14.81 ± 0.45  | 14.65 ± 0.35              | 14.85 ± 0.40            | 14.65 ± 0.33           | 14.70 ± 0.19          | 14.91 ± 0.27           | 14.91 ± 0.25             |
| Day4                      | 14.80 ± 0.43  | 14.51 ± 0.53              | 14.35 ± 0.64*           | 14.55 ± 0.24           | 14.25 ± 0.23**        | 14.50 ± 0.45           | 14.64 ± 0.41             |
| Day7                      | 14.61 ± 0.35  | 14.48 ± 0.16              | 14.65 ± 0.27            | 14.25 ± 0.24           | 14.36 ± 0.18          | 14.53 ± 0.39           | 14.46 ± 0.22             |
| Day9                      | 14.77 ± 0.32  | 14.45 ± 0.21              | 14.23 ± 0.45**          | 14.61 ± 0.38           | 14.44 ± 0.21          | 14.16 ± 0.38**         | 14.59 ± 0.41             |
| Day11                     | 14.58 ± 0.26  | 14.20 ± 0.14              | 14.23 ± 0.39            | 14.13 ± 0.23*          | 14.29 ± 0.60          | 14.24 ± 0.24           | 14.46 ± 0.23             |
| Day14                     | 14.67 ± 0.35  |                           | 14.03 ± 0.48****        | 14.05 ± 0.32****       | 14.14 ± 0.15***       | 14.13 ± 0.36***        | 14.26 ± 0.21*            |
| Day16                     | 14.65 ± 0.30  |                           | 14.10 ± 0.47***         | 14.11 ± 0.30***        | 14.46 ± 0.11          | 14.08 ± 0.25***        | 14.13 ± 0.21***          |
| Day18                     | 14.57 ± 0.32  |                           | 14.1                    | 14.03 ± 0.25***        | 14.21 ± 0.27*         | 14.04 ± 0.23***        | 14.18 ± 0.19*            |
| Day25                     | 14.44 ± 0.19  |                           | 13.2***                 | 13.84 ± 0.29***        | 14.09 ± 0.34*         | 13.91 ± 0.28***        | 14.05 ± 0.19*            |
| MCHC (pg)                 | Group I       | Group II<br>(Non treated) | Group III<br>(10 mg/kg) | Group IV<br>(20 mg/kg) | Group V<br>(30 mg/kg) | Group VI<br>(50 mg/kg) | Group VII<br>(100 mg/kg) |
| Pre                       | 32.03 ± 0.67  | 31.86 ± 0.57              | 31.63 ± 0.95            | 31.30 ± 0.43           | 31.19 ± 0.52          | 31.49 ± 0.40           | 31.58 ± 0.71             |
| Day2                      | 32.19 ± 0.83  | 32.01 ± 0.78              | 31.84 ± 0.75            | 31.66 ± 0.27           | 31.83 ± 0.28          | 32.25 ± 0.51           | 32.19 ± 0.59             |
| Day4                      | 32.01 ± 0.88  | 32.11 ± 1.27              | 31.38 ± 1.27            | 31.91 ± 0.27           | 31.48 ± 0.44          | 31.79 ± 0.96           | 31.90 ± 1.05             |
| Day7                      | 31.61 ± 0.56  | 32.23 ± 0.39              | 31.91 ± 0.49            | 31.26 ± 0.41           | 31.59 ± 0.38          | 31.71 ± 0.67           | 31.61 ± 0.31             |
| Day9                      | 31.98 ± 0.69  | 31.55 ± 0.21              | 30.68 ± 0.78***         | 32.14 ± 0.65           | 31.63 ± 0.27          | 31.06 ± 0.65*          | 31.75 ± 0.70             |
| Day11                     | 31.88 ± 0.58  | 31.55 ± 0.49              | 29.99 ± 0.77****        | 31.21 ± 0.39           | 31.78 ± 1.26          | 31.44 ± 0.46           | 31.70 ± 0.52             |
| Day14                     | 31.92 ± 0.69  |                           | 30.26 ± 1.20****        | 31.01 ± 0.22**         | 31.31 ± 0.57          | 31.00 ± 0.51**         | 31.15 ± 0.40*            |
| Day16                     | 31.90 ± 0.58  |                           | 31.19 ± 0.90*           | 31.24 ± 0.31           | 31.63 ± 0.36          | 31.16 ± 0.40*          | 30.96 ± 0.31**           |
| Day18                     | 31.73 ± 0.74  |                           | 29.00****               | 30.90 ± 0.41**         | 31.23 ± 0.63          | 31.08 ± 0.22           | 31.19 ± 0.53             |
| Day25                     | 31.49 ± 0.58  |                           | 28.20****               | 31.03 ± 0.40           | 31.16 ± 0.60          | 31.13 ± 0.47           | 31.13 ± 0.35             |
| PLT (10 <sup>4</sup> /μL) | Group I       | Group II<br>(Non treated) | Group III<br>(10 mg/kg) | Group IV<br>(20 mg/kg) | Group V<br>(30 mg/kg) | Group VI<br>(50 mg/kg) | Group VII<br>(100 mg/kg) |
| Pre                       | 89.07 ± 11.68 | 86.14 ± 8.51              | 76.08 ± 12.60           | 87.00 ± 15.36          | 80.45 ± 8.21          | 84.69 ± 8.31           | 87.06 ± 11.58            |
| Day2                      | 91.13 ± 9.29  | 85.85 ± 8.34              | 68.56 ± 7.37***         | 78.28 ± 13.66          | 75.46 ± 8.29*         | 81.10 ± 8.03           | 75.49 ± 10.04*           |
| Day4                      | 88.93 ± 7.60  | 96.59 ± 20.58             | 80.21 ± 11.45           | 83.91 ± 9.80           | 87.41 ± 5.64          | 77.28 ± 16.35          | 81.23 ± 15.52            |
| Day7                      | 99.19 ± 10.13 | 92.38 ± 35.46             | 56.79 ± 19.09****       | 84.21 ± 10.48*         | 92.38 ± 11.91         | 87.63 ± 7.18           | 92.64 ± 5.62             |
| Day9                      | 97.83 ± 12.31 | 53.05 ± 13.22****         | 54.06 ± 15.59****       | 78.71 ± 6.21**         | 81.64 ± 9.73*         | 89.08 ± 11.51          | 95.10 ± 12.12            |
| Day11                     | 88.97 ± 11.00 | 48.85 ± 2.33***           | 71.64 ± 18.38*          | 88.48 ± 14.26          | 88.94 ± 7.99          | 93.74 ± 13.87          | 93.04 ± 8.77             |
| Day14                     | 90.93 ± 6.16  |                           | 83.89 ± 17.10           | 89.40 ± 9.89           | 95.48 ± 15.07         | 83.83 ± 13.36          | 96.49 ± 12.58            |
| Day16                     | 84.89 ± 10.01 |                           | 89.75 ± 22.04           | 82.53 ± 10.59          | 87.19 ± 8.62          | 87.65 ± 11.62          | 83.18 ± 7.31             |
| Day18                     | 94.73 ± 7.27  |                           | 63.3                    | 78.58 ± 18.47*         | 87.79 ± 9.43          | 94.15 ± 17.73          | 92.54 ± 8.80             |
| Day25                     | 91.15 ± 8.32  |                           | 68.9                    | 91.47 ± 9.38           | 81.91 ± 10.45         | 82.11 ± 11.63          | 83.34 ± 12.63            |

WBC: white blood cell, RBC: red blood cell, HGB: hemoglobin, HCT: hematocrit, MCV: mean cell volume, MCH: mean cell hemoglobin, MCHC: mean cell hemoglobin concentration, PLT: platelet.

\*,  $p < 0.05$ , \*\*,  $p < 0.01$ , \*\*\*,  $p < 0.001$ , \*\*\*\*,  $p < 0.0001$ .Supplement

Table S2: Summary of histopathological analysis

|             | Group III<br>(10 mg/kg)                               |                     | Group IV<br>(20 mg/kg)                                                                            |                        | Group V<br>(30 mg/kg)                                                              |                        | Group VI<br>(50 mg/kg)                    |                        | Group VII<br>(100 mg/kg)                                                                                |                        |
|-------------|-------------------------------------------------------|---------------------|---------------------------------------------------------------------------------------------------|------------------------|------------------------------------------------------------------------------------|------------------------|-------------------------------------------|------------------------|---------------------------------------------------------------------------------------------------------|------------------------|
| Mice number | 1                                                     |                     | 7                                                                                                 |                        | 8                                                                                  |                        | 8                                         |                        | 8                                                                                                       |                        |
| Tissue      | Pathological<br>[n, %]                                | PCR positive<br>(%) | Pathological<br>[n, %]                                                                            | PCR<br>positive<br>(%) | Pathological<br>[n, %]                                                             | PCR<br>positive<br>(%) | Pathological<br>[n, %]                    | PCR<br>positive<br>(%) | Pathological<br>[n, %]                                                                                  | PCR<br>positive<br>(%) |
| Liver       | vasculitis(mild) [1, 100%]                            | 1 (100)             | vasculitis<br>(mild) [3, 43%],<br>focal necrosis,<br>vasculitis/periv<br>asculitis [2,<br>28.57%] | 2 (28.57)              | vasculitis<br>(mild) [4,<br>50.00 %],<br>pericholangitis<br>(mild) [2,<br>25.00 %] | 0 (0)                  | pericholangitis<br>(mild) [1,<br>12.50 %] | 0 (0)                  | vasculitis<br>(mild) [2,<br>25.00 %],<br>focal necrosis,<br>vasculitis/periv<br>asculitis [1,<br>12.5%] | 0 (0)                  |
| Spleen      |                                                       | 1 (100)             | focal necrosis,<br>splenomegaly<br>[1, 14.29 %]                                                   | 2 (28.57)              |                                                                                    | 0 (0)                  |                                           | 0 (0)                  |                                                                                                         | 0 (0)                  |
| Kidney      |                                                       | 1 (100)             | vasculitis/periv<br>asculitis [1,<br>14.29 %]                                                     | 3 (42.86)              |                                                                                    | 0 (0)                  |                                           | 0 (0)                  |                                                                                                         | 0 (0)                  |
| Heart       | necrotising artelitis in the<br>aortic root [1, 100%] | 1 (100)             | myocarditis [1,<br>14.29 %]                                                                       | 4 (57.14)              |                                                                                    | 1 (12.5)               |                                           | 0 (0)                  |                                                                                                         | 0 (0)                  |
| Lung        |                                                       | 1 (100)             | interstitial<br>neumonia<br>(mild) [1,<br>14.29 %]                                                | 4 (57.14)              |                                                                                    | 1 (12.5)               |                                           | 0 (0)                  |                                                                                                         | 0 (0)                  |
| Fat         | lymphocitic panniculitis [1,<br>100%]                 | 1 (100)             |                                                                                                   | 4 (57.14)              |                                                                                    | 0 (0)                  |                                           | 0 (0)                  |                                                                                                         | 0 (0)                  |
| Blain       |                                                       | 1 (100)             | non-<br>suppurative<br>meningoencep<br>halitis [1,<br>14.29 %]                                    | 3 (42.86)              |                                                                                    | 0 (0)                  |                                           | 0 (0)                  |                                                                                                         | 0 (0)                  |

Trypanosome was detected only in a mouse in group IV (20 mg/kg), which is shown parasitemia on 28 dpi by immunohistochemistry.
