# Supplementary figures and images for: Therapeutic Efficacy of Orally Administered Nitrofurantoin against Animal African Trypanosomosis Caused by Trypanosoma congolense Infection
Source: MDPI journal article supplement (doi:10.3390/pathogens11030331), 2022-03-09

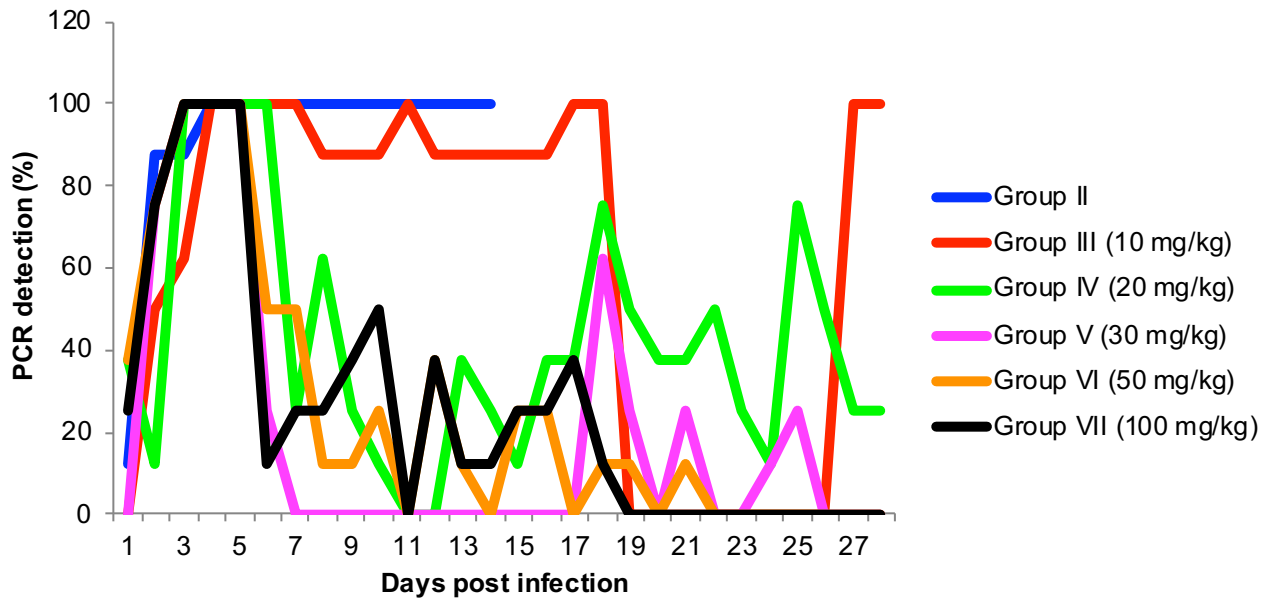

Supplement: s1 [file s1]
